# Supplementary material
Source: PubMed Central journal article supplement (PMC7675785)
Supplement: NIHMS1619612-supplement-Supplemental_Reference_List.pdf [file NIHMS1619612-supplement-Supplemental_Reference_List.pdf]

## Supplemental File 1: Reference List

1. Canales MK, Geller BM (2004) Moving in between mammography: screening decisions of American Indian women in Vermont. *Qual Health Res* 14(6):836-857. doi:10.1177/1049732304265845
2. Daley CM, Kraemer-Diaz A, James AS, et al (2012) Breast cancer screening beliefs and behaviors among American Indian women in Kansas and Missouri: a qualitative inquiry. *J Cancer Educ Off J Am Assoc Cancer Educ* 27(1 Suppl):S32-40. doi:10.1007/s13187-012-0334-3
3. Shelton RC, Winkel G, Davis SN, et al (2010) Validation of the Group-Based Medical Mistrust Scale among urban Black men. *J Gen Intern Med* 25(6):549-555. doi:10.1007/s11606-010-1288-y
4. Thorburn S, Kue J, Keon KL, Lo P (2013) Medical mistrust and discrimination in health care: a qualitative study of Hmong women and men. *J Community Health* 37(4):822-829. doi:10.1007/s10900-011-9516-x
5. Ferrera MJ, Feinstein RT, Walker WJ, Gehlert SJ (2016) Embedded mistrust then and now: findings of a focus group study on African American perspectives on breast cancer and its treatment. *Crit Public Health* 26(4):455-465. doi:10.1080/09581596.2015.1117576
6. Thompson HS, Valdimarsdottir HB, Jandorf L, Redd W (2003) Perceived disadvantages and concerns about abuses of genetic testing for cancer risk: differences across African American, Latina and Caucasian women. *Patient Educ Couns* 51(3):217-227. doi:10.1016/s0738-3991(02)00219-7
7. Arnold LD, McGilvray MM, Kyle Cooper J, James AS (2017) Inadequate Cancer Screening: Lack of provider continuity is a greater obstacle than medical mistrust. *J Health Care Poor Underserved* 28(1):362-377. doi:10.1353/hpu.2017.0028
8. Hong HC, Ferrans CE, Park C, Lee H, Quinn L, Collins EG (2018) Effects of perceived discrimination and trust on breast cancer screening among Korean American women. *Women's Health Issues* 28(2):188-196. doi:10.1016/j.whi.2017.11.001
9. Katapodi MC, Pierce PF, Facione NC (2010) Distrust, predisposition to use health services and breast cancer screening: results from a multicultural community-based survey. *Int J Nurs Stud* 47(8):975-983. doi:10.1016/j.ijnurstu.2009.12.014
10. Yang T-C, Matthews SA, Hillemeier MM (2011) Effect of health care system distrust on breast and cervical cancer screening in Philadelphia, Pennsylvania. *Am J Public Health* 101(7):1297-1305. doi:10.2105/AJPH.2010.300061
11. Barsevick AM, Leader A, Bradley PK, et al (2016) Post-treatment problems of African American breast cancer survivors. *Support Care Cancer* 24(12):4979-4986. doi:10.1007/s00520-016-3359-z
12. Bickell NA, Weidmann J, Fei K, Lin JJ, Leventhal H (2009) Underuse of breast cancer adjuvant treatment: patient knowledge, beliefs, and medical mistrust. *J Clin Oncol* 27(31):5160-5167. doi:10.1200/JCO.2009.22.9773

13. Dean LT, Moss SL, McCarthy AM, Armstrong K (2017) Healthcare system distrust, physician trust, and patient discordance with adjuvant breast cancer treatment recommendations. *Cancer Epidemiol Biomark Prev* 26(12):1745-1752. doi:10.1158/1055-9965.EPI-17-0479
14. Jiang Y, Sereika SM, Bender CM, Brufsky AM, Rosenzweig MQ (2016) Beliefs in chemotherapy and knowledge of cancer and treatment among African American women with newly diagnosed breast cancer. *Oncol Nurs Forum* 43(2):180-189. doi:10.1188/16.ONF.180-189
15. Maly RC, Stein JA, Umezawa Y, Leake B, Anglin MD (2008) Racial/ethnic differences in breast cancer outcomes among older patients: effects of physician communication and patient empowerment. *Health Psychol* 27(6):728-736. doi:10.1037/0278-6133.27.6.728
16. Ahmed NU, Fort JG, Elzey JD, Bailey S (2004) Empowering factors in repeat mammography: insights from the stories of underserved women. *J Ambulatory Care Manage* 27(4):348-355. doi:10.1097/00004479-200410000-00007
17. Brandzel S, Chang E, Tuzzio L, et al (2016) Latina and Black/African American women's perspectives on cancer screening and cancer screening reminders. *J Racial Ethn Health Disparities* doi:10.1007/s40615-016-0304-2
18. Sheppard VB, Mays D, LaVeist T, Tercyak KP (2013) Medical mistrust and self-efficacy influence Black women's level of engagement in BRCA1/2 genetic counseling and testing. *J Natl Med Assoc* 105(1):17-22.
19. Molina Y, Kim S, Berrios N, Calhoun EA (2015) Medical mistrust and patient satisfaction with mammography: the mediating effects of perceived self-efficacy among navigated African American women. *Health Expect* 18(6):2941-2950. doi:10.1111/hex.12278
20. Sutton AL, He J, Edmonds MC, Sheppard VB (2019) Medical mistrust in black breast cancer patients: acknowledging the roles of the trustor and the trustee. *J Cancer Educ* 34(3):600-607. doi:10.1007/s13187-018-1347-3
